# Supplementary material
Source: Springer Nature journal article supplement (https://www.springermedizin.de/resource/supplementary/12943_2013_1479_MOESM3_ESM.pdf/9553110)

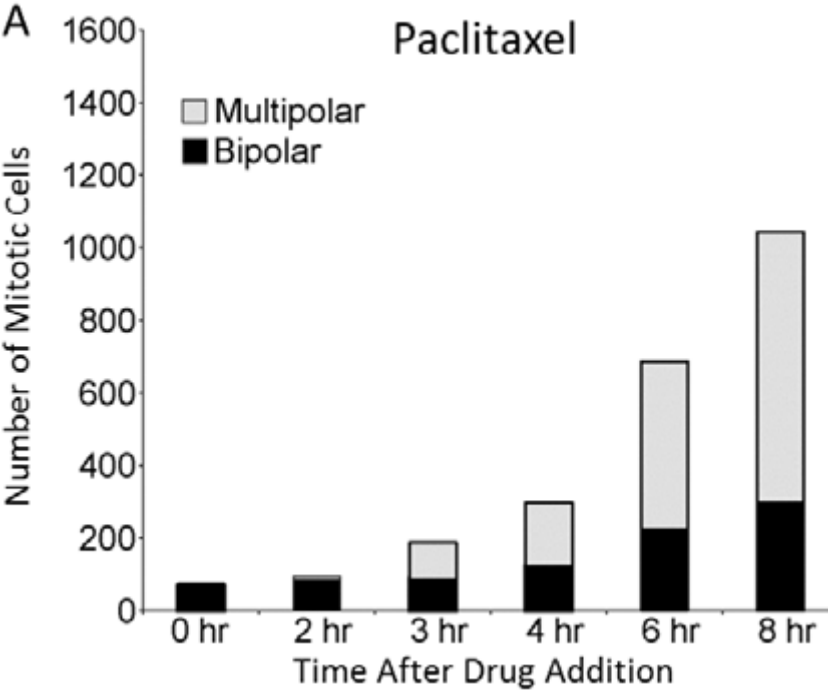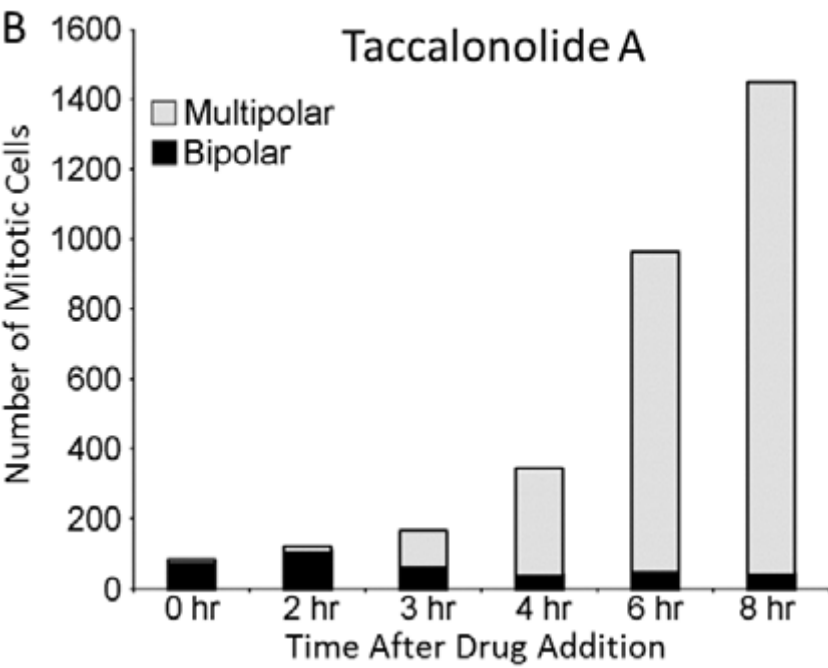

Supplement: MOESM3 [file 9553110]
